# Supplementary material for: Versatile Bispidine‐Based Bifunctional Chelators for 64CuII‐Labelling of Biomolecules
Source: PubMed Central journal article supplement (PMC7028042; doi:10.1002/chem.201904654), 2020-01-09
Supplement: CHEM-26-1989-s001.pdf [file CHEM-26-1989-s001.pdf]

# CHEMISTRY

## A **European** Journal

### Supporting Information

#### **Versatile Bispidine-Based Bifunctional Chelators for $^{64}\text{Cu}^{\text{II}}$ -Labelling of Biomolecules**

Garima Singh,<sup>[a]</sup> Kristof Zarschler,<sup>\*[a]</sup> Sebastian Hunoldt,<sup>[a]</sup> Irma Ivette Santana Martínez,<sup>[a]</sup>  
Carmen L. Ruehl,<sup>[b]</sup> Madlen Matterna,<sup>[a]</sup> Ralf Bergmann,<sup>[a]</sup> Domokos Máthé,<sup>[c, d]</sup>  
Nikolett Hegedüs,<sup>[c]</sup> Michael Bachmann,<sup>[a]</sup> Peter Comba,<sup>\*[b]</sup> and Holger Stephan<sup>\*[a]</sup>

chem\_201904654\_sm\_miscellaneous\_information.pdf

## Table of contents:

**Figure S1.** <sup>1</sup>H NMR (A), <sup>13</sup>C NMR (B) and characteristic chemical shifts of protons of *anti*- and *syn*-product of **1**

**Figure S2.** <sup>1</sup>H NMR (A), ESI-MS (B) and FT-IR (C) of **2**

**Figure S3.** <sup>1</sup>H NMR (A), <sup>13</sup>C NMR (B), ESI-MS (C) and FT-IR (D) of **3**.

**Figure S4.** <sup>1</sup>H NMR (A), ESI-MS (B) and FT-IR (C) of **4**.

**Figure S5.** <sup>1</sup>H NMR (A), <sup>13</sup>C NMR (B), ESI-MS (C) and FT-IR (D) of **5**.

**Figure S6.** <sup>1</sup>H NMR (A), ESI-MS (B) and FT-IR (C) of **6**.

**Figure S7.** Radio-TLC analysis of ligand exchange reactions in presence of EDTA (A) and DOTA (B) as competing ligand (1000-fold excess) after 24 h at 37°C.

**Figure S8.** MALDI-TOF mass spectra of cetuximab before (A) and after (B) conjugation with **5**.

**Figure S9.** Thin-layer chromatography of <sup>64</sup>Cu-labelled bispidine-conjugated cetuximab. Radiolabelled **5'** remains at the origin ( $R_f = 0$ ), whereas [<sup>64</sup>Cu]Cu-EDTA<sup>2-</sup> migrates with the solvent front ( $R_f = 1$ ). Noteworthy, any excess of [<sup>64</sup>Cu]CuCl<sub>2</sub> is complexed by the addition of EDTA.

**Figure S10.** SDS-PAGE analysis of sortase-mediated azide-functionalisation of the single-domain antibody (sdAb) derivative 7C12-Strep-sortag-6HIS. The molar amount of (Gly)<sub>3</sub>-Lys-N<sub>3</sub> was varied (50-500 nmol) while the amount of the sdAb as well as the enzyme was kept constant (50 nmol).

**Figure S11.** Radio-TLC analysis of <sup>64</sup>Cu-labelled bispidine-conjugated sdAb. After conjugation of the chelating agent, the conjugate **6'** was labelled with [<sup>64</sup>Cu]CuCl<sub>2</sub> and analysed by radio-TLC. Radiolabelled **6'** remains at the origin ( $R_f = 0$ ), whereas [<sup>64</sup>Cu]Cu-EDTA migrates with the solvent front ( $R_f = 1$ ). The reference [<sup>64</sup>Cu]Cu-**6** has an  $R_f$  of ~0.7. Noteworthy, any excess of [<sup>64</sup>Cu]CuCl<sub>2</sub> was complexed prior to TLC by the addition of EDTA.

**Figure S12.** Confocal immunofluorescence microscopy images of A431 cells exposed to **6'** for up to 24 h showing specific binding and co-localisation of the immunoconjugate with EGFR. A431 cells were incubated with 100 nM **6'** for the indicated periods at 37°C. Binding of the immunoconjugates to plasma membrane localised EGFR was analysed by indirect immunofluorescence. To visualise the expression of EGFR, an anti-EGFR Alexa Fluor® 647 antibody conjugate was used (A; red fluorescence). An anti-Strep-tag Chromo™488 conjugate was used to detect the Strep-tagged **6'** (B; green fluorescence). The nuclei were visualised by the DNA binding stain Hoechst 33258 (C; blue fluorescence). The overlay of (A), (B) and (C) is shown in (D). Scale bars = 20 μm.

**Table S1.** Stability assessment of [<sup>64</sup>Cu]Cu-labelled bispidine derivatives by radio-challenge experiments. Radiolabelled substances were incubated for the indicated period in the presence of 1000-fold molar excess of the challenging ligands EDTA or DOTA, respectively. Following radio-TLC, the amount (%) of [<sup>64</sup>Cu]Cu-EDTA or [<sup>64</sup>Cu]Cu-DOTA formed was determined.

**Table S2.** List of the expected average molecular masses as well as observed m/z values of the singly-charged and doubly-charged molecular ions for each protein derivative.

A)

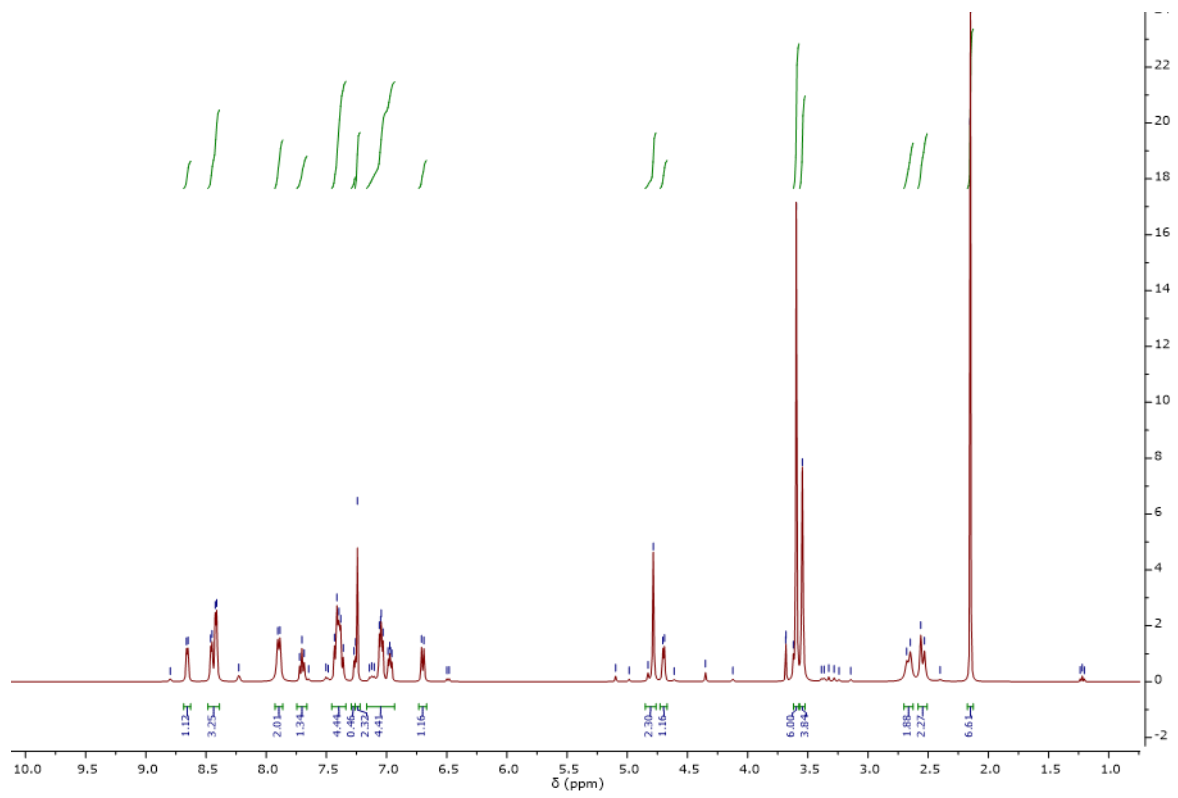

B)

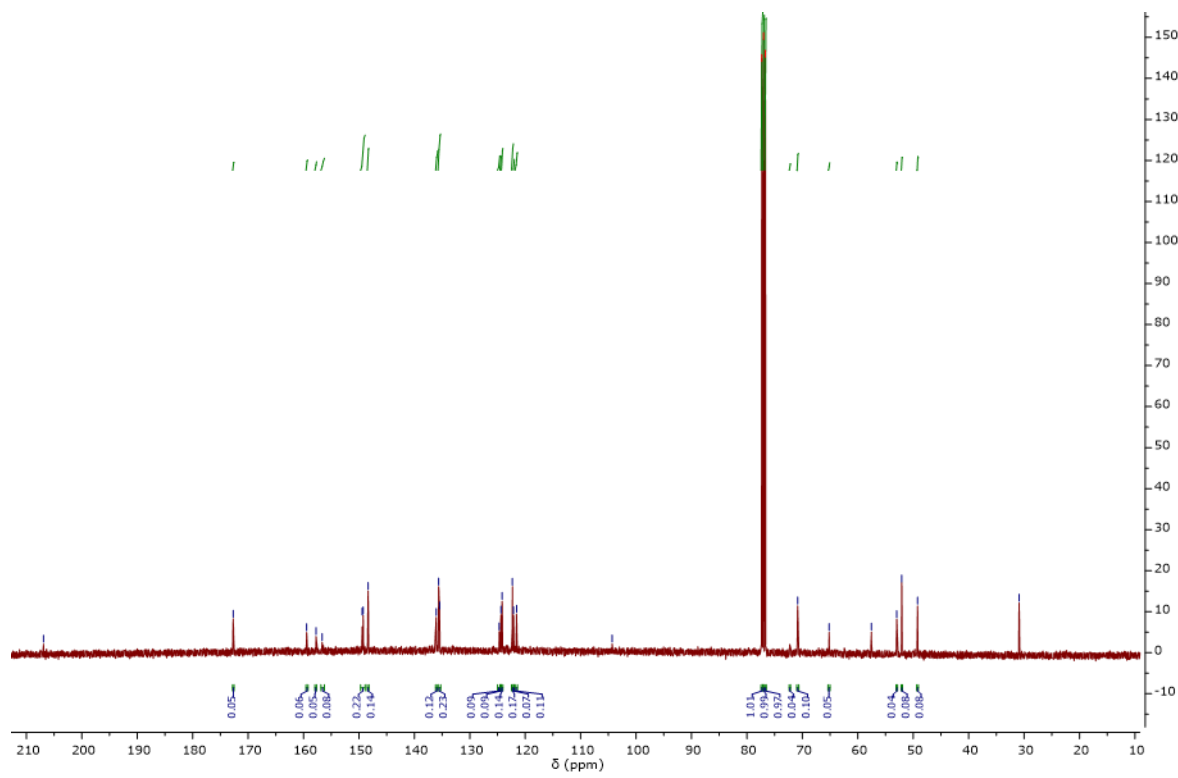

c)

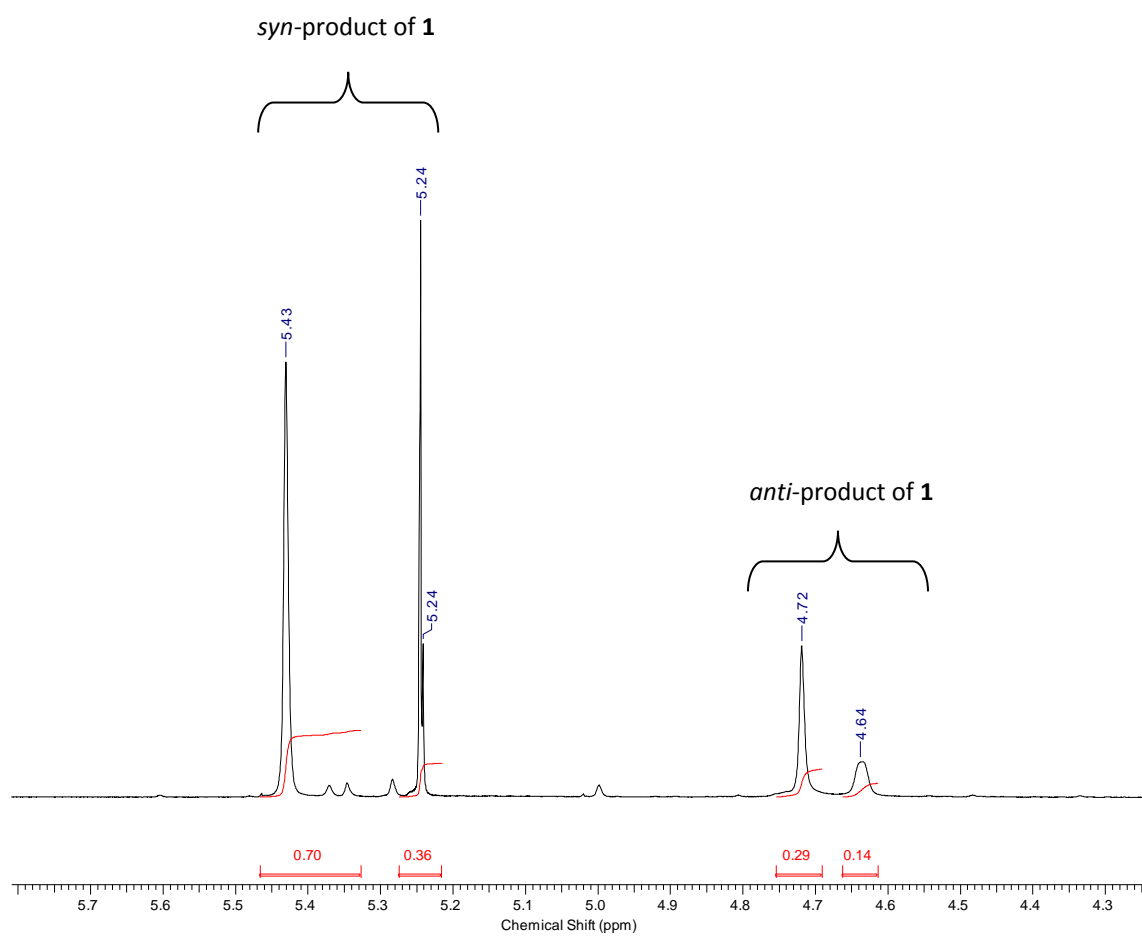

**Figure S1.**  $^1\text{H}$  NMR (A),  $^{13}\text{C}$  NMR (B) and characteristic chemical shifts of protons of *anti*- and *syn*-product\* of **1**.

\* reduction of bispidine with  $\text{NaBH}_4$  in dry methanol yields 70 % *syn*- and 30 % *anti*-product; reduction in dioxane/water (3/2 = v/v) exclusively yields the *anti*-product.

A)

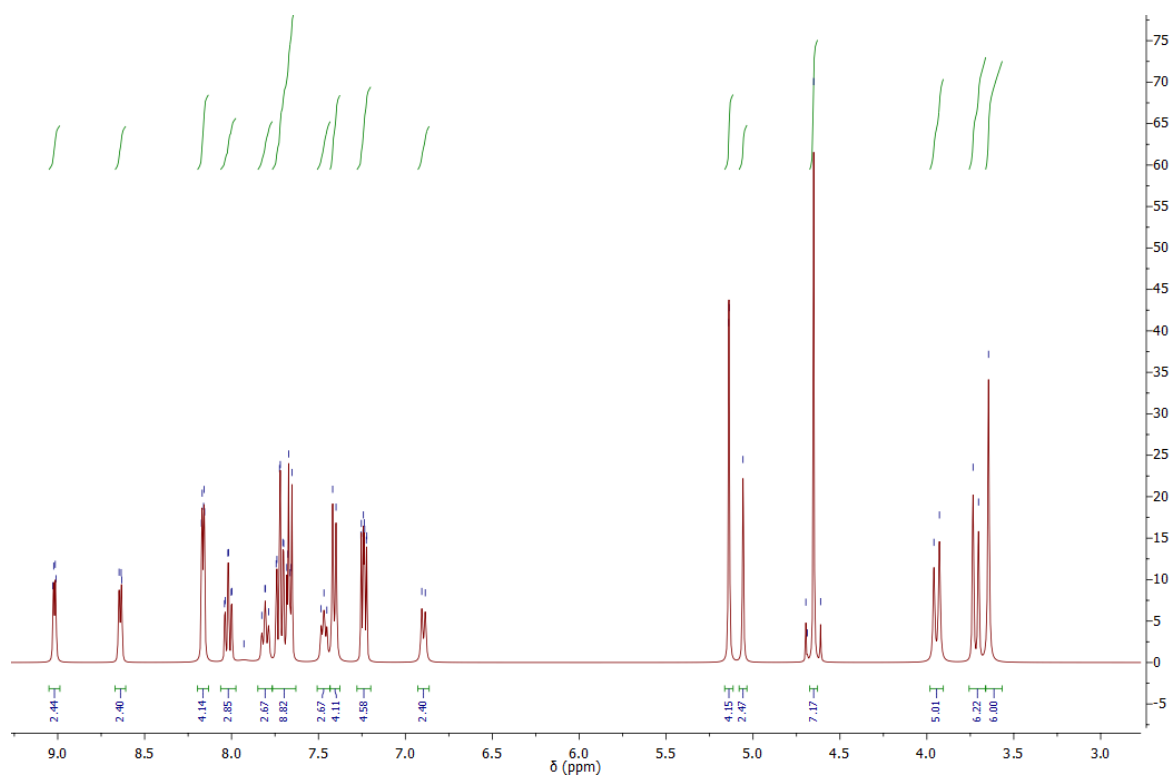

B)

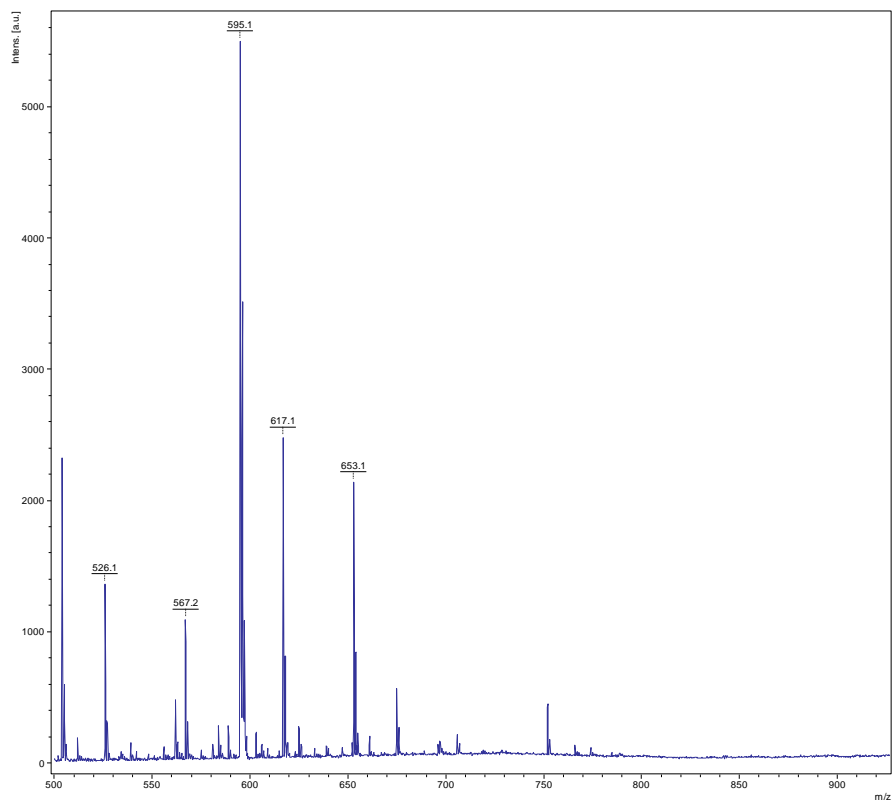

c)

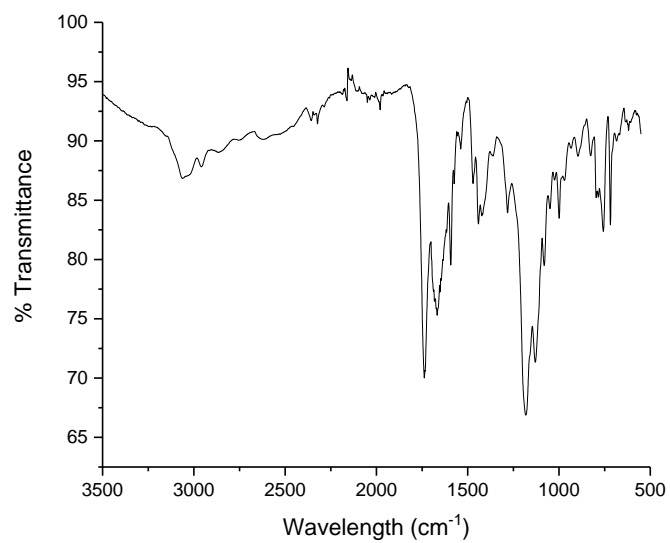

Figure S1. <sup>1</sup>H NMR (A), ESI-MS (B) and FT-IR (C) of 2.

A)

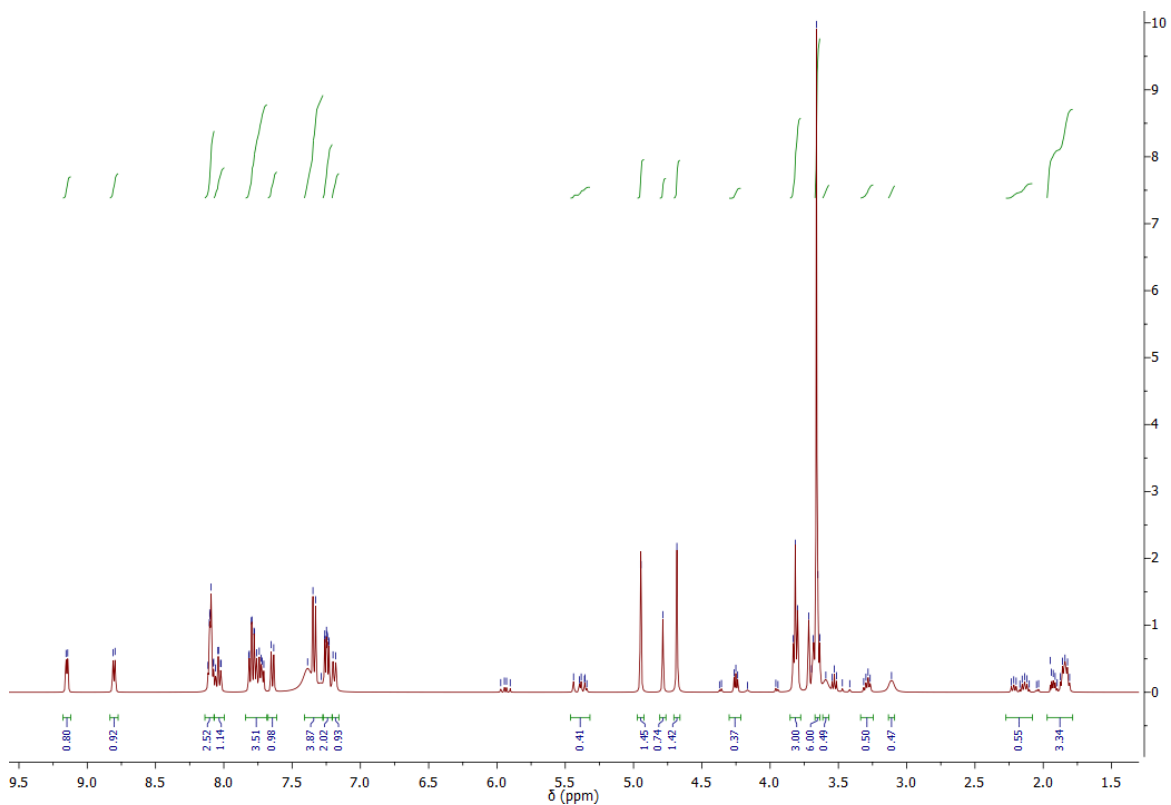

B)

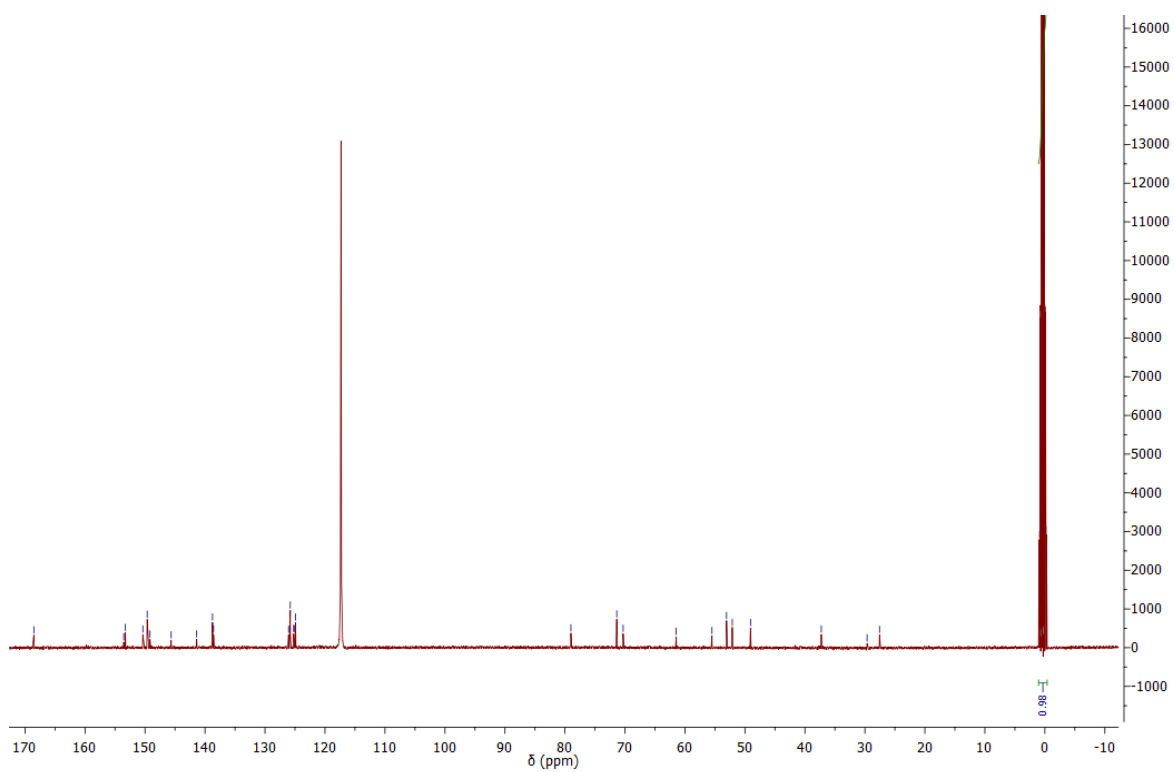

C)

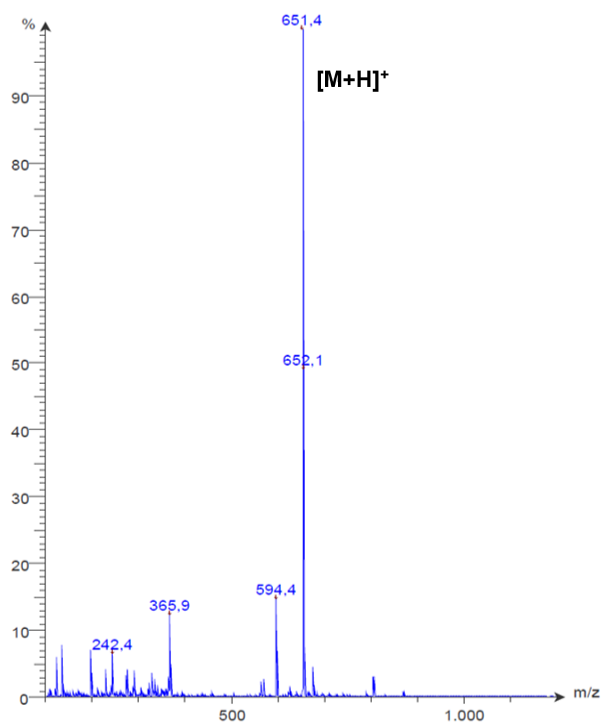

D)

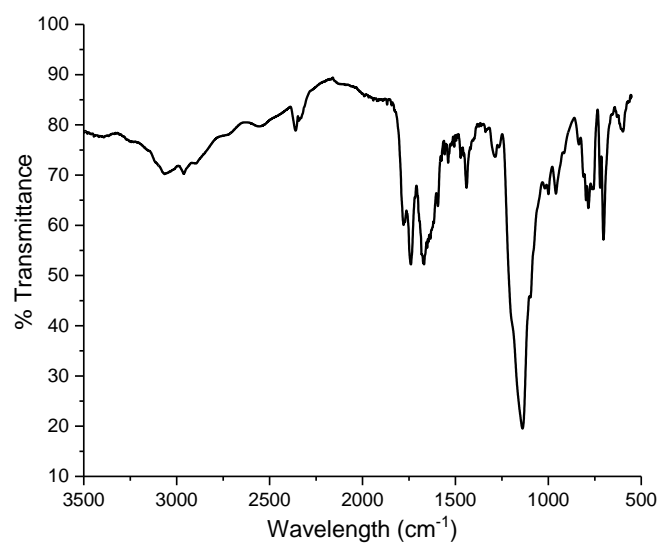

Figure S2. <sup>1</sup>H NMR (A), <sup>13</sup>C NMR (B), ESI-MS (C) and FT-IR (D) of **3**.

A)

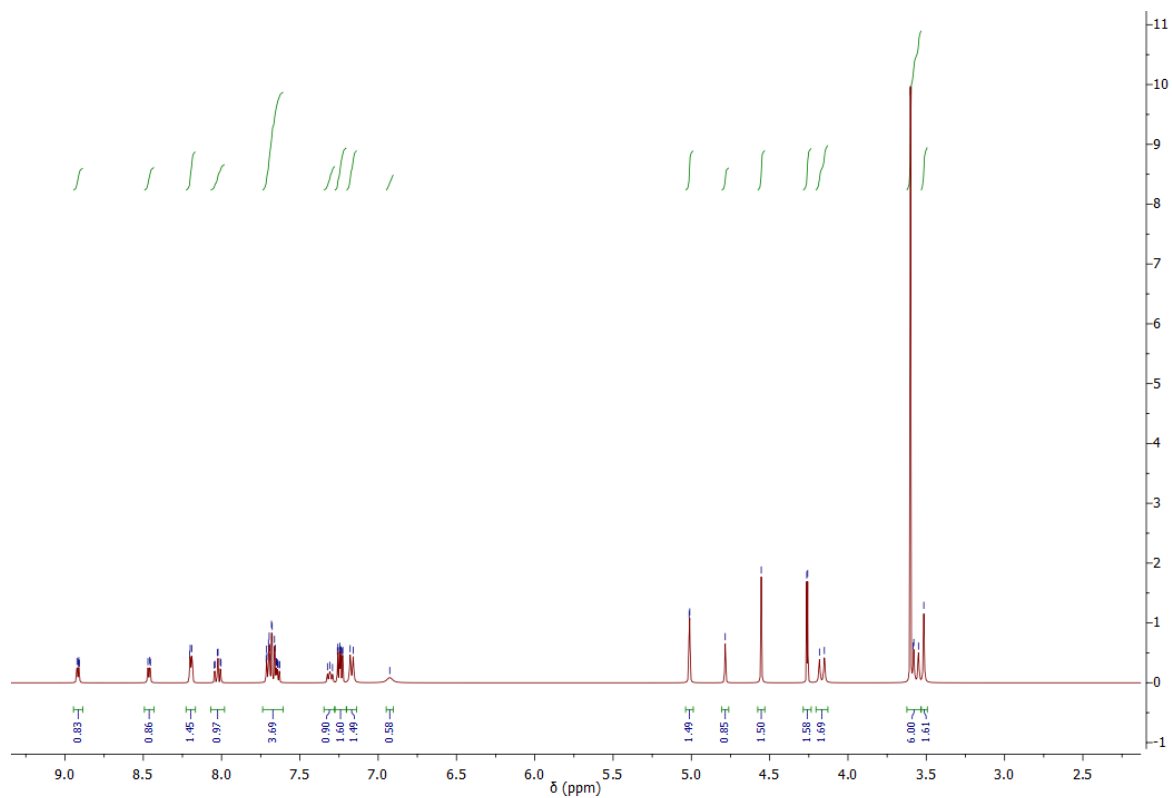



B)

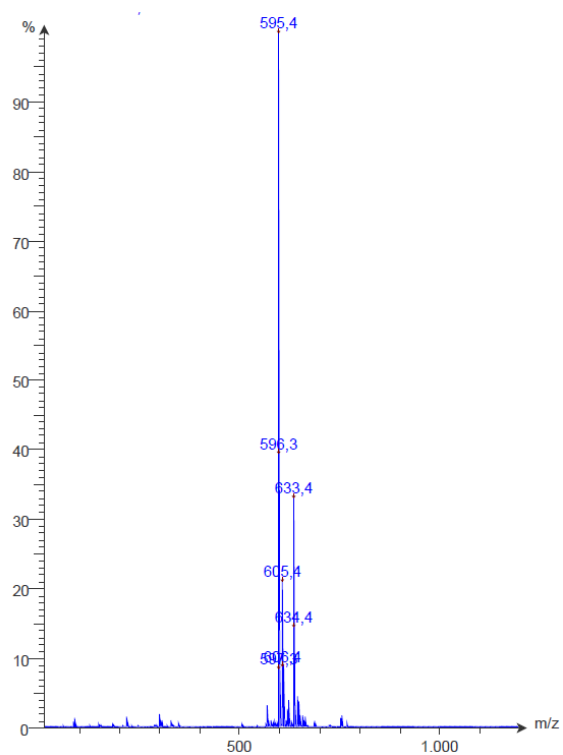

C)

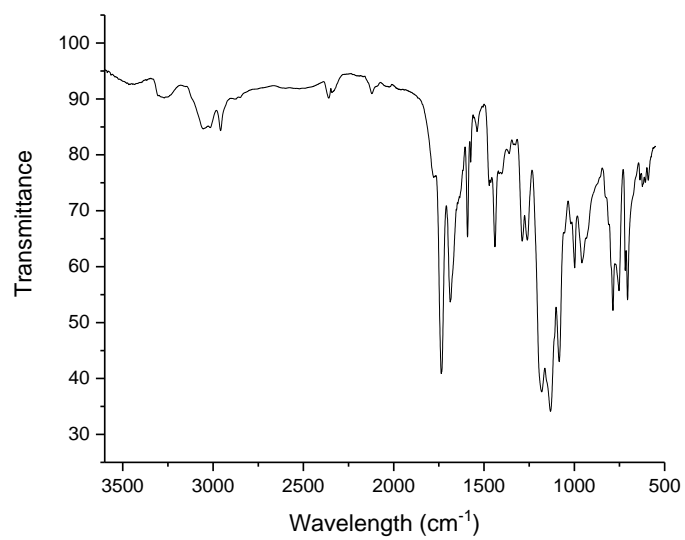

Figure S3. <sup>1</sup>H NMR (A), ESI-MS (B) and FT-IR (C) of 4.

A)

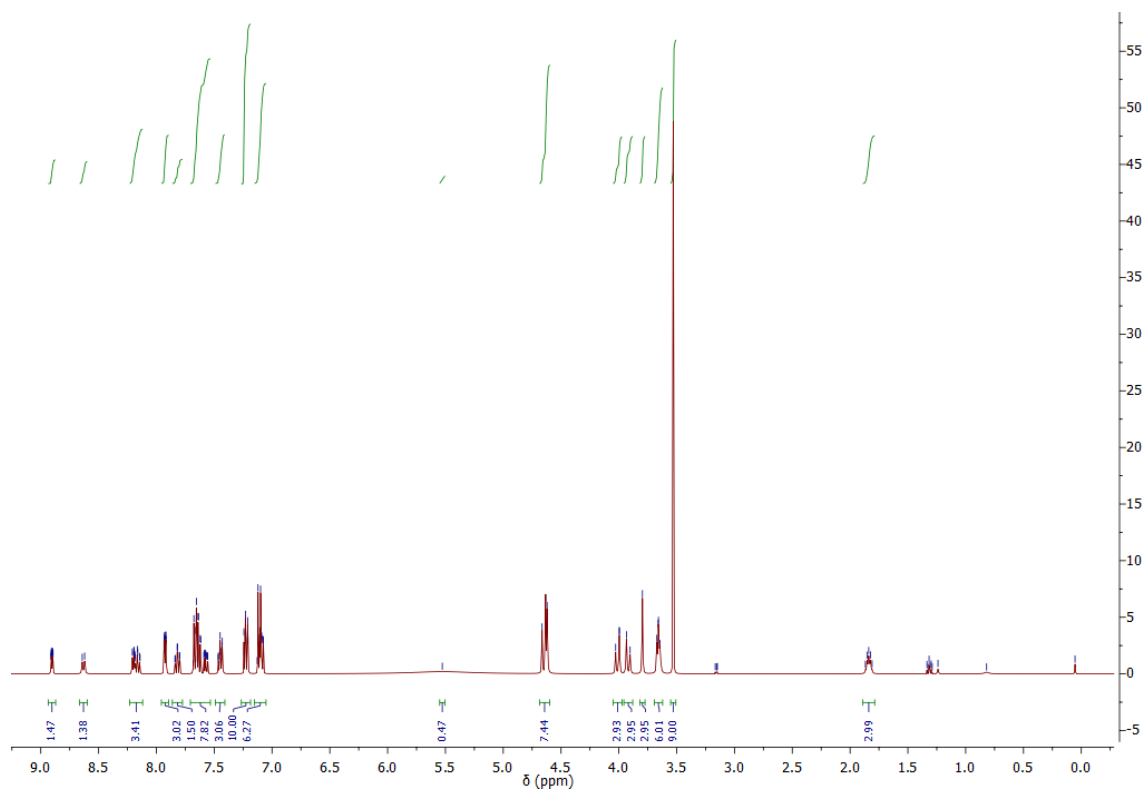

B)

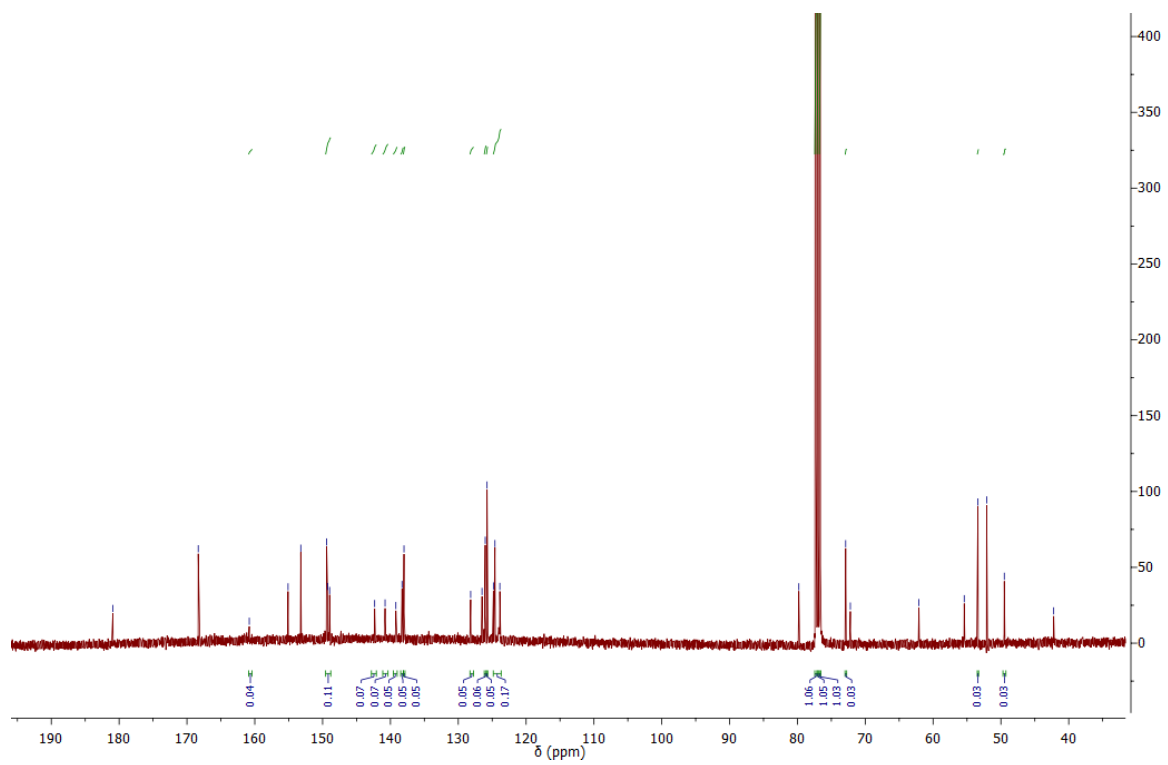

C)

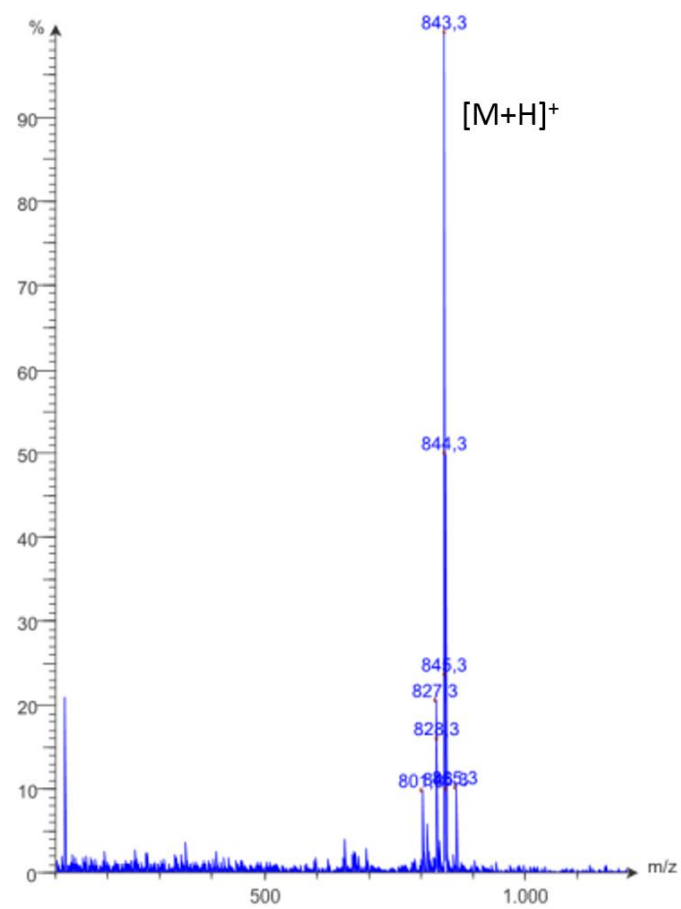

D)

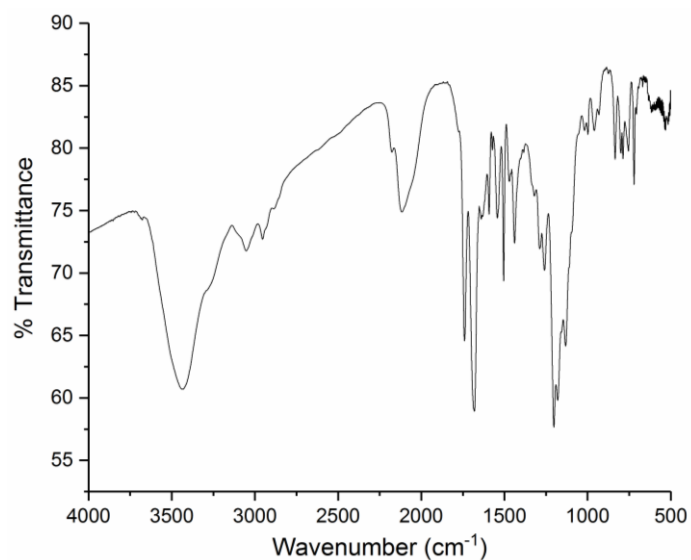

**Figure S4.** <sup>1</sup>H NMR (A), <sup>13</sup>C NMR (B), ESI-MS (C) and FT-IR (D) of **5**.

A)

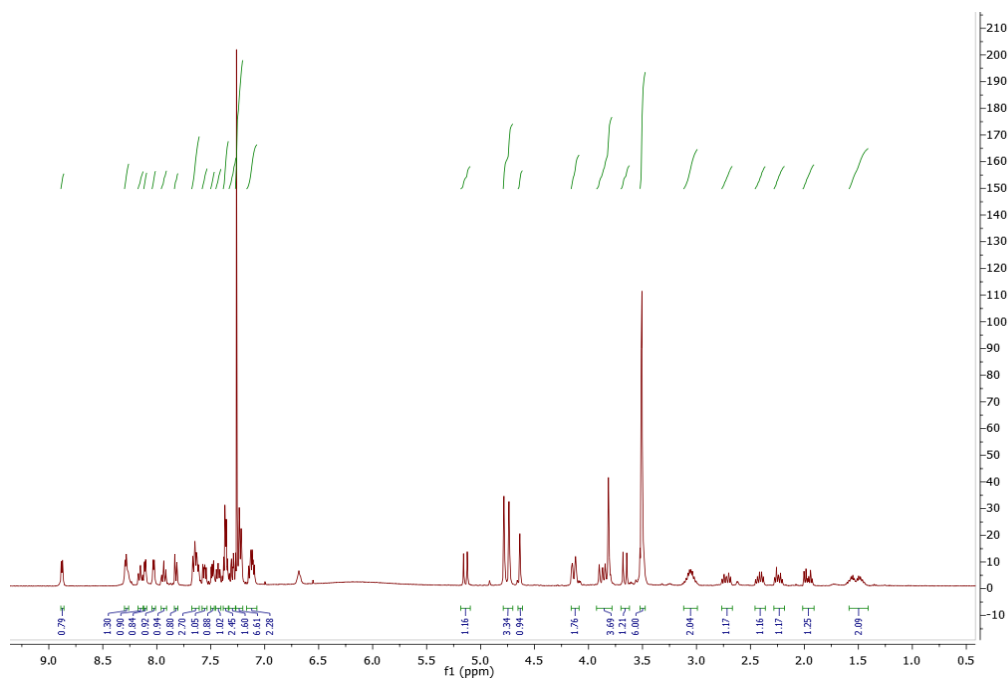

B)

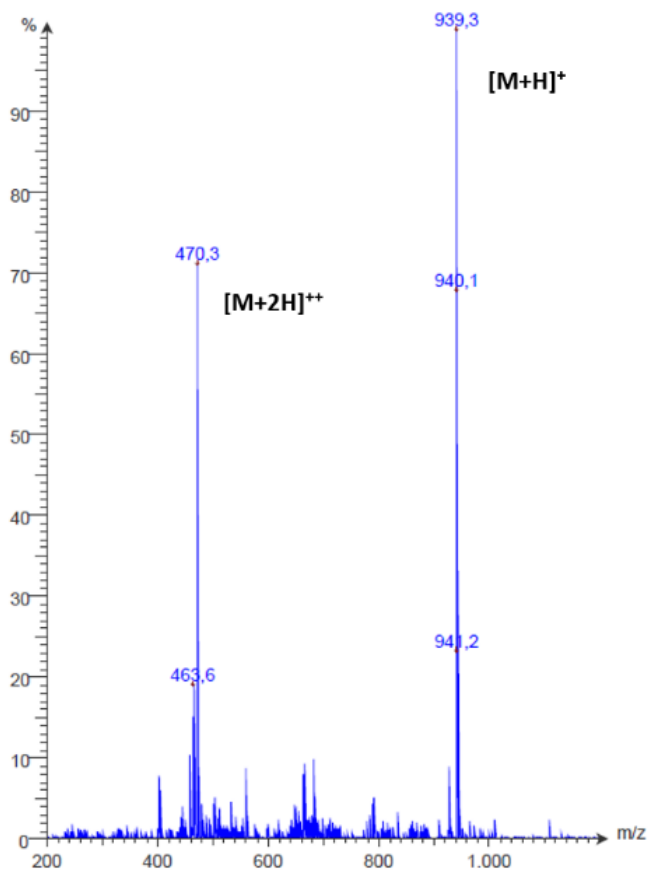

c)

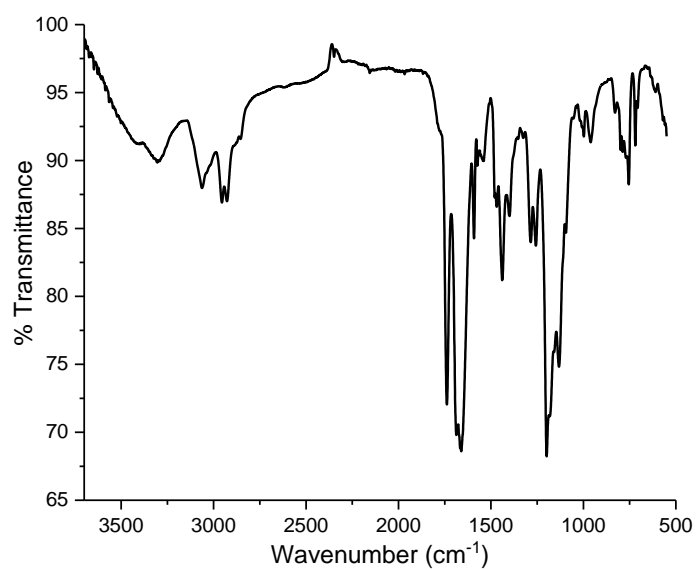

**Figure S5.** <sup>1</sup>H NMR (A), ESI-MS (B) and FT-IR (C) of **6**.

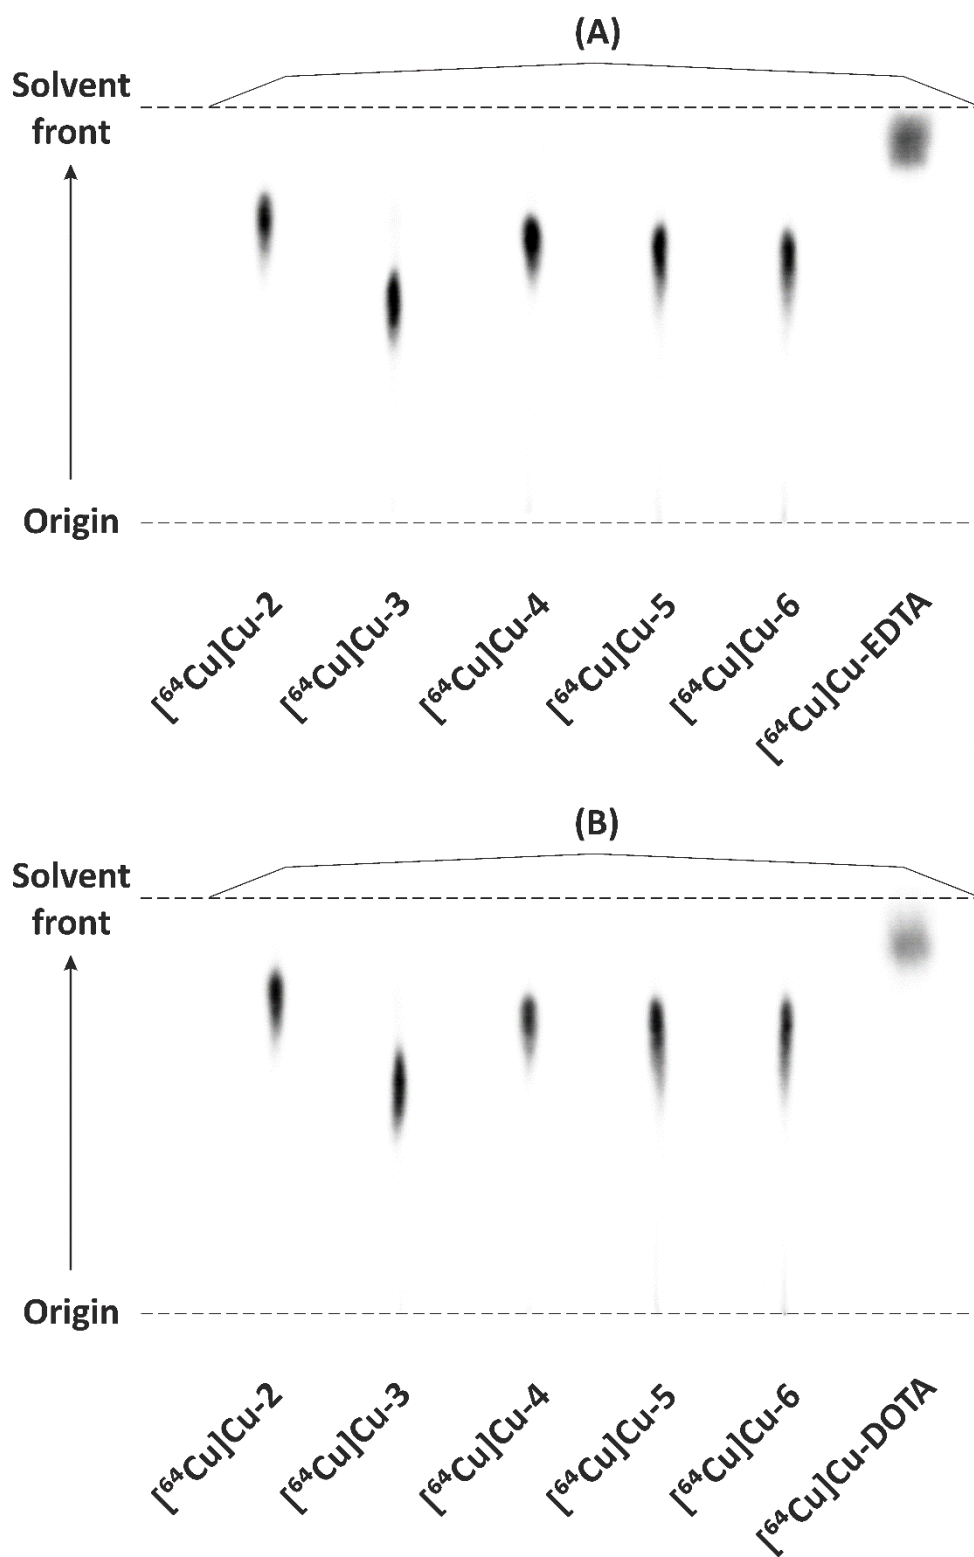

**Figure S6.** Radio-TLC analysis of ligand exchange reactions in presence of EDTA (A) and DOTA (B) as competing ligand (1000-fold excess) after 24 h at 37°C.

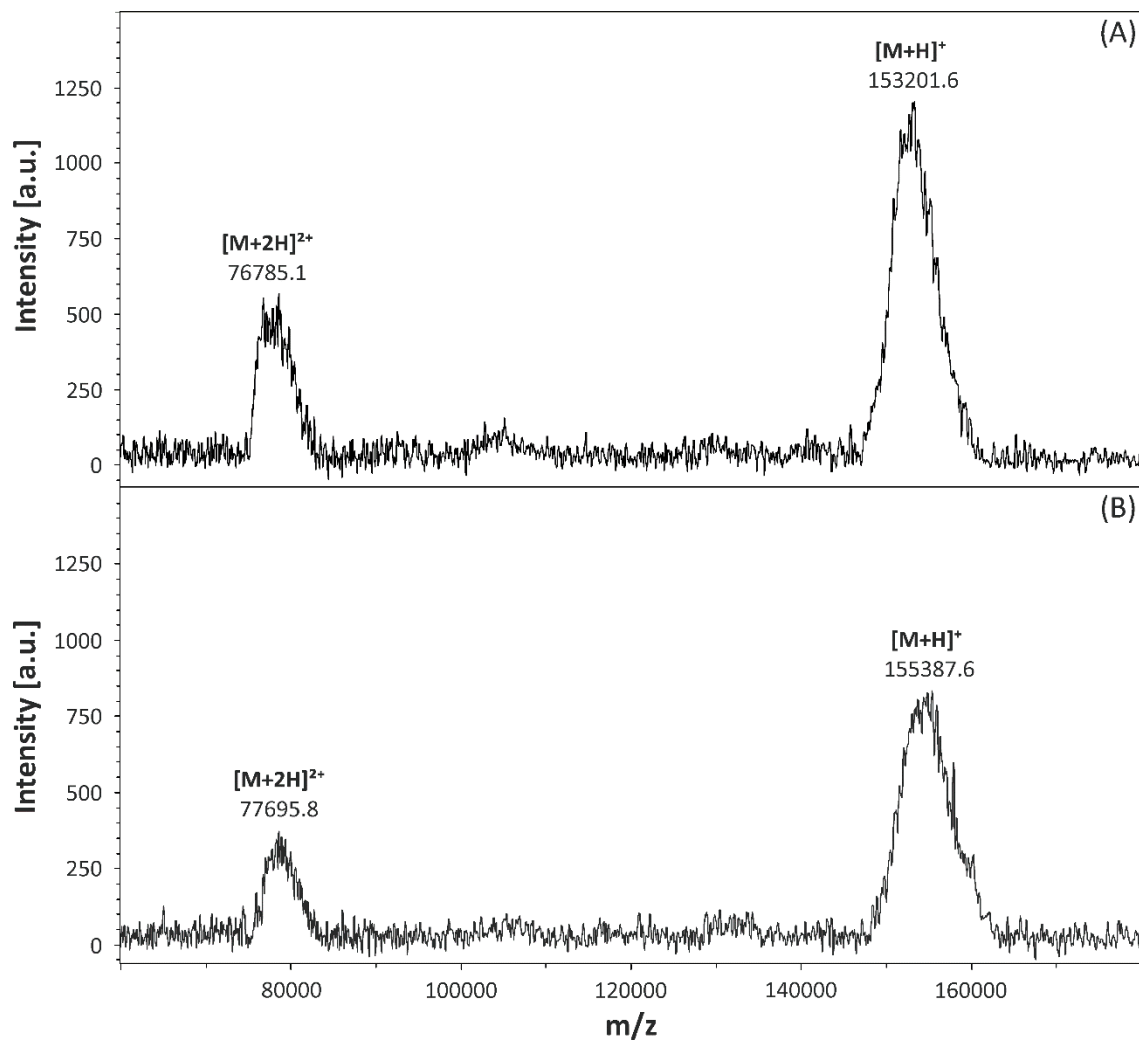

**Figure S7.** MALDI-TOF mass spectra of cetuximab before (A) and after (B) conjugation with 5.

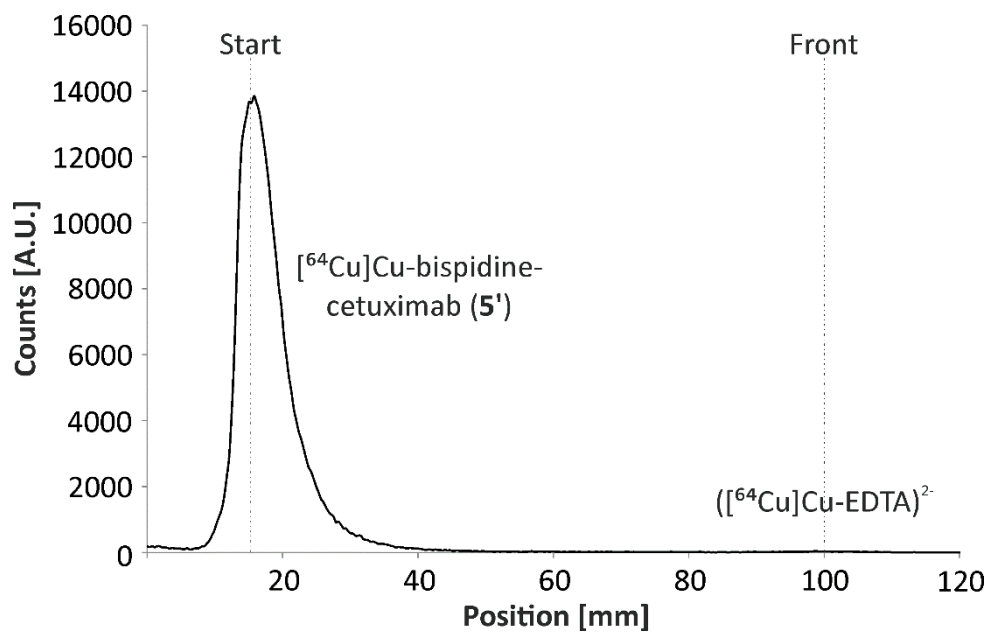

**Figure S8.** Thin-layer chromatography of <sup>64</sup>Cu-labelled bispidine-conjugated cetuximab. Radiolabelled **5'** remains at the origin ( $R_f = 0$ ), whereas  $([^{64}\text{Cu}]\text{Cu-EDTA})^{2-}$  migrates with the solvent front ( $R_f = 1$ ). Noteworthy, any excess of  $[^{64}\text{Cu}]\text{CuCl}_2$  is complexed by the addition of EDTA.



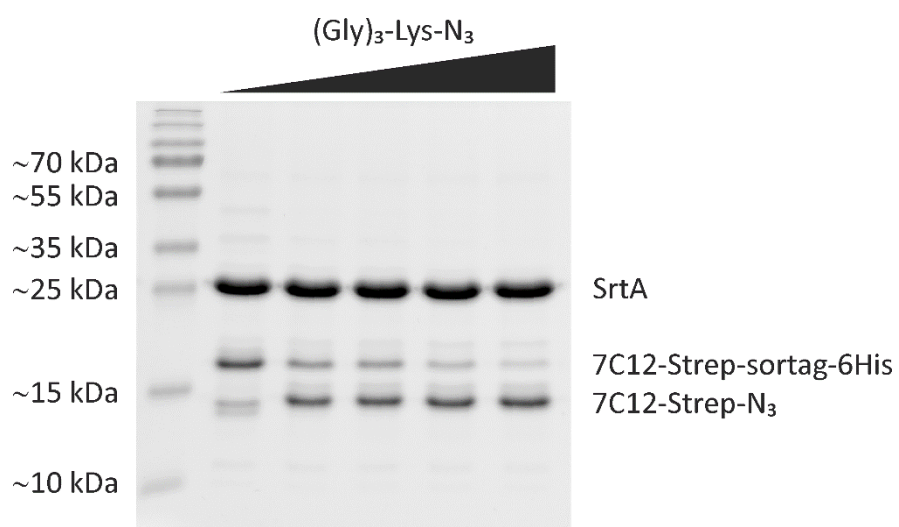

**Figure S9.** SDS-PAGE analysis of sortase-mediated azide-functionalisation of the single-domain antibody (sdAb) derivative 7C12-Strep-sortag-6HIS. The molar amount of  $(\text{Gly})_3\text{-Lys-N}_3$  was varied (50-500 nmol) while the amount of the sdAb as well as the enzyme was kept constant (50 nmol).

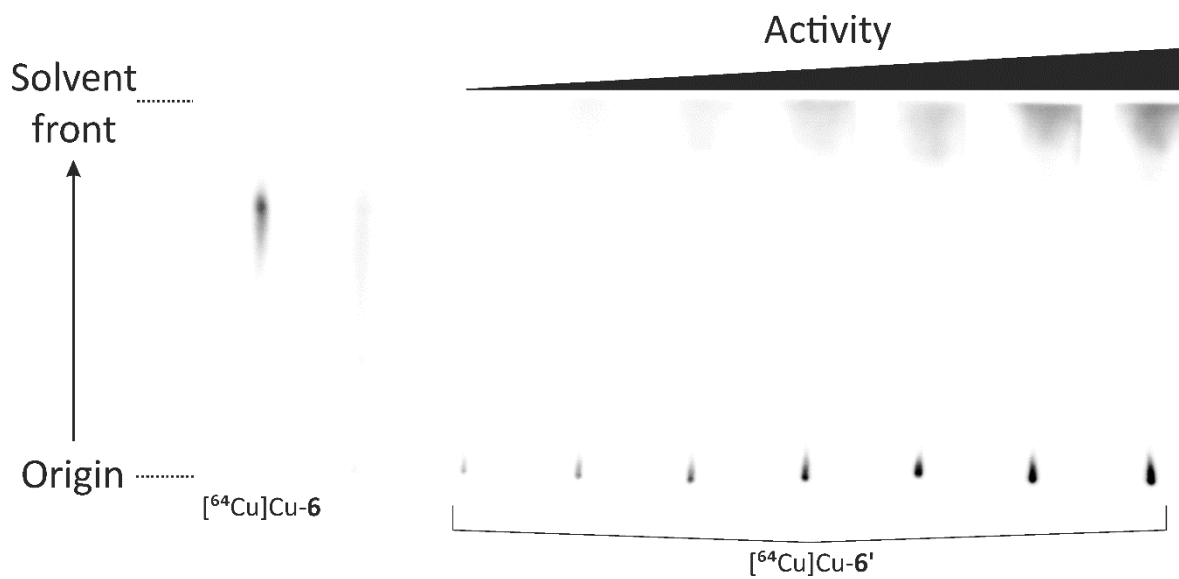

**Figure S10.** Radio-TLC analysis of  $^{64}\text{Cu}$ -labelled bispidine-conjugated sdAb. After conjugation of the chelating agent, the conjugate **6'** was labelled with  $[^{64}\text{Cu}]\text{CuCl}_2$  and analysed by radio-TLC. Radiolabelled **6'** remains at the origin ( $R_f = 0$ ), whereas  $[^{64}\text{Cu}]\text{Cu-EDTA}$  migrates with the solvent front ( $R_f = 1$ ). The reference  $[^{64}\text{Cu}]\text{Cu-6}$  has an  $R_f$  of  $\sim 0.7$ . Noteworthy, any excess of  $[^{64}\text{Cu}]\text{CuCl}_2$  was complexed prior to TLC by the addition of EDTA.

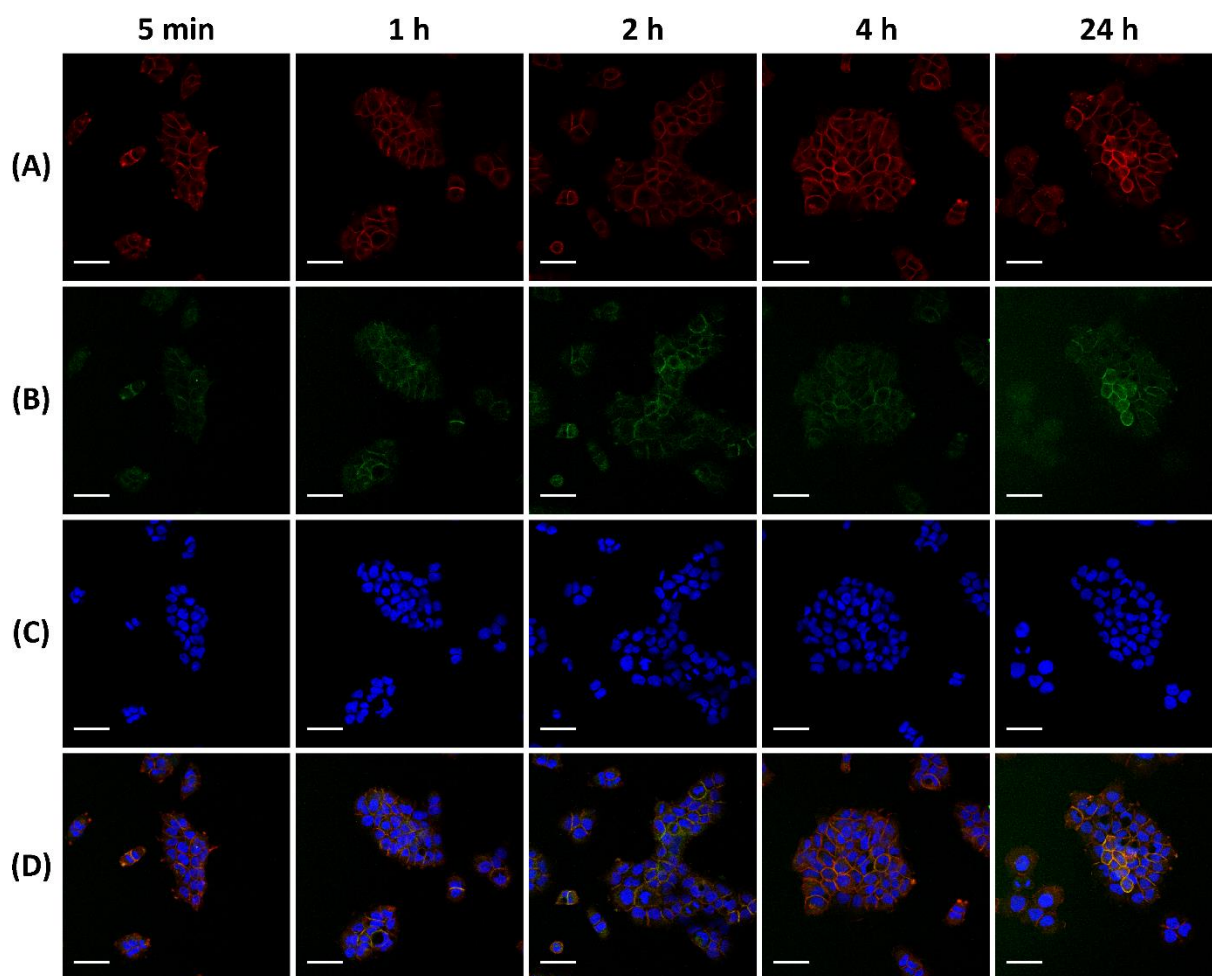

**Figure S11.** Confocal immunofluorescence microscopy images of A431 cells exposed to **6'** for up to 24 h showing specific binding and co-localisation of the immunoconjugate with EGFR. A431 cells were incubated with 100 nM **6'** for the indicated periods at 37°C. Binding of the immunoconjugates to plasma membrane localised EGFR was analysed by indirect immunofluorescence. To visualise the expression of EGFR, an anti-EGFR Alexa Fluor® 647 antibody conjugate was used (A; red fluorescence). An anti-Strep-tag Chromeo™488 conjugate was used to detect the Strep-tagged **6'** (B; green fluorescence). The nuclei were visualised by the DNA binding stain Hoechst 33258 (C; blue fluorescence). The overlay of (A), (B) and (C) is shown in (D). Scale bars = 20 μm.

**Table S1.** Stability assessment of [<sup>64</sup>Cu]Cu-labelled bispidine derivatives by radiochallenge experiments. Radiolabelled substances were incubated for the indicated period in the presence of 1000-fold molar excess of the challenging ligands EDTA or DOTA, respectively. Following radio-TLC, the amount (%) of [<sup>64</sup>Cu]Cu-EDTA or [<sup>64</sup>Cu]Cu-DOTA formed was determined.

|                                   | Incubation time |       |       |       |
|-----------------------------------|-----------------|-------|-------|-------|
|                                   | 1 h             | 2 h   | 4 h   | 24 h  |
| <b>EDTA challenge</b>             |                 |       |       |       |
| Bispidine-acetic acid <b>2</b>    | 0.030           | 0.028 | 0.018 | 0.034 |
| Bispidine-amine <b>3</b>          | 0.048           | 0.023 | 0.029 | 0.054 |
| Bispidine-alkyne <b>4</b>         | 0.038           | 0.031 | 0.024 | 0.044 |
| Bispidine-isothiocyanate <b>5</b> | 0.034           | 0.006 | 0.010 | 0.073 |
| Bispidine-DBCO <b>6</b>           | 0.044           | 0.025 | 0.032 | 0.055 |

|                                   | Incubation time |       |       |       |
|-----------------------------------|-----------------|-------|-------|-------|
|                                   | 1 h             | 2 h   | 4 h   | 24 h  |
| <b>DOTA challenge</b>             |                 |       |       |       |
| Bispidine-acetic acid <b>2</b>    | 0.019           | 0.010 | 0.025 | 0.012 |
| Bispidine-amine <b>3</b>          | 0.018           | 0.029 | 0.024 | 0.015 |
| Bispidine-alkyne <b>4</b>         | 0.025           | 0.018 | 0.018 | 0.016 |
| Bispidine-isothiocyanate <b>5</b> | 0.003           | 0.011 | 0.009 | 0.010 |
| Bispidine-DBCO <b>6</b>           | 0.026           | 0.025 | 0.022 | 0.013 |

**Table S2.** List of the expected average molecular masses as well as observed m/z values of the singly-charged and doubly-charged molecular ions for each protein derivative.

| Protein / Conjugate       | Calculated molecular mass | Observed m/z       |                      |
|---------------------------|---------------------------|--------------------|----------------------|
|                           |                           | [M+H] <sup>+</sup> | [M+2H] <sup>2+</sup> |
| 7C12-Strep-sortag-6HIS    | 18428.9                   | 18322.4            | 9153.3               |
| 7C12-Strep-N <sub>3</sub> | 16646.2                   | 16551.9            | 8236.3               |
| <b>6'</b>                 | 17584.4                   | 17444.9            | 8721.7               |
